# Supplementary material
Source: publisher figshare collection journal article supplement (https://frontiersin.figshare.com/ndownloader/files/15050861)
Supplement: Supplementary file 1 [file 15050861]

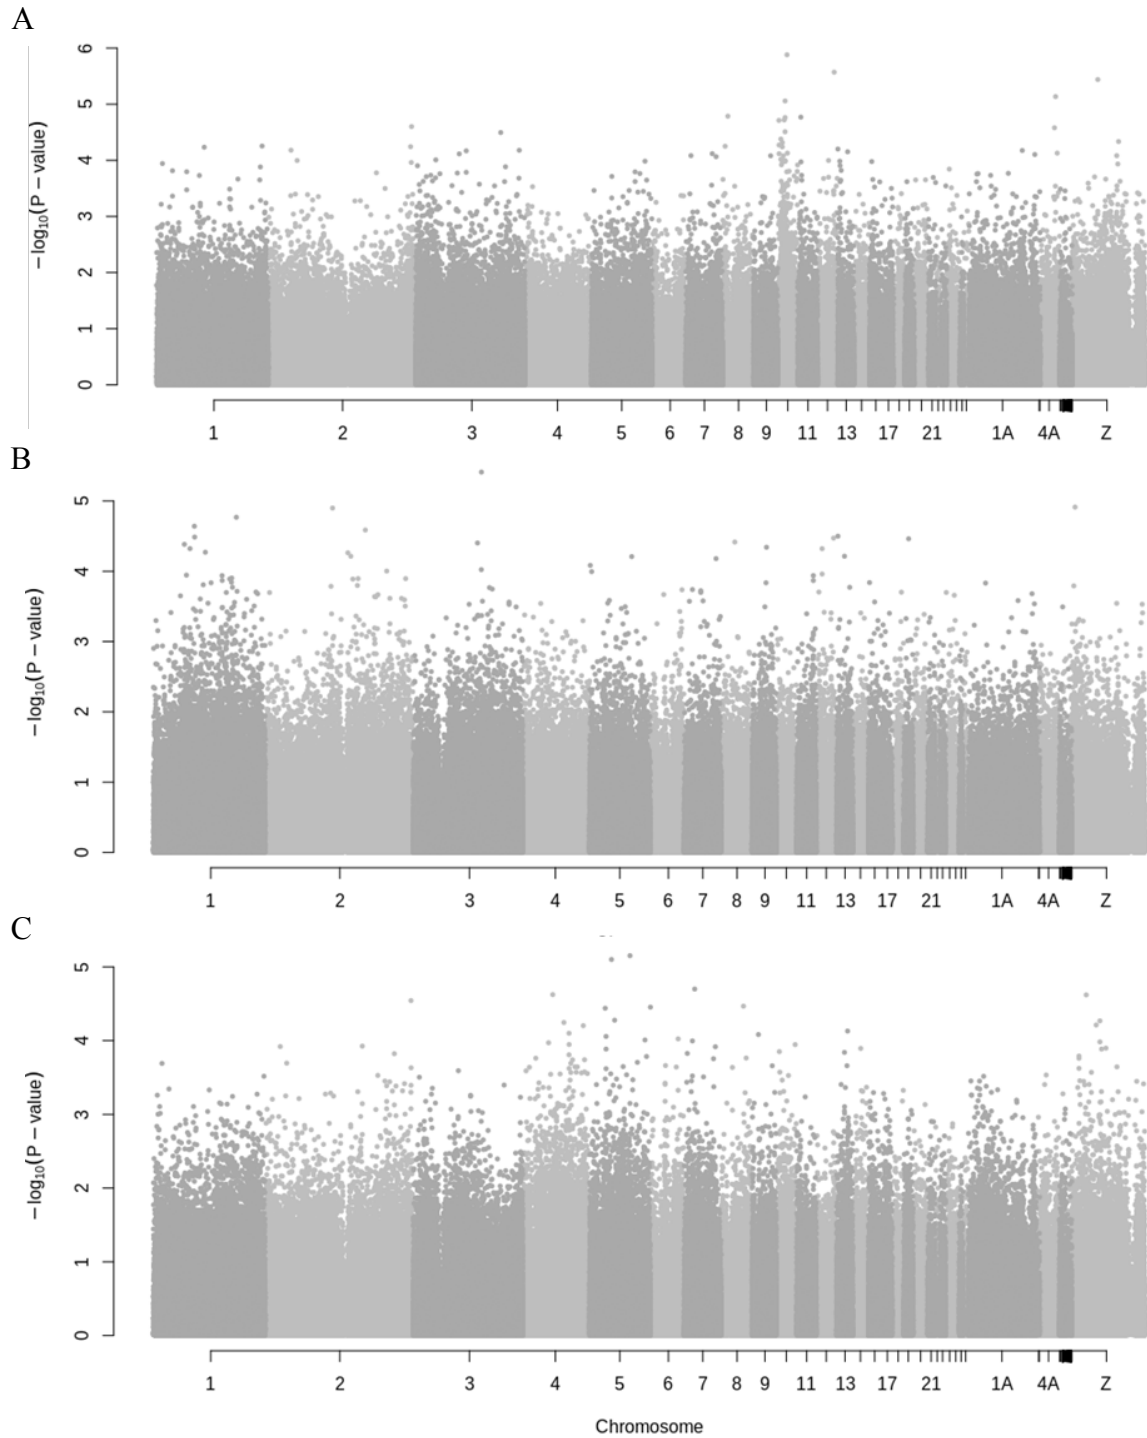

**Supplementary Figure 3.** Significances (shown as  $-\log_{10}$ ) of all SNPs included in the genome-wide association analyses for A. *Tau*, B. *onset phase* and C. *DD phase shift*. Points are color-coded by chromosome
